# Supplementary material
Source: publisher site journal article supplement (https://www.dovepress.com/get_supplementary_file.php?f=447560.docx)
Supplement: Supplementary file 1 [file get_supplementary_file.php]

# Supplementary materials

***Supplementary Table 1. Conditions included in QCA analysis***

| Predictor in literature (for either abstinence or relapse) | Merged into |
| --- | --- |
| Psychiatric co-morbidity*1–5, negative emotions* 2,6, impulsivity*2 | Psychiatric co-morbidity (+/-) |
| Low education level*5, Mild to Borderline Intellectual Disability (MBID)* 7,8 | MBID (-) |
| Social disintegration*9–11, socioeconomic status*10 | Social disintegration (-) |
| Treatment length*, treatment completion*12–15 | Long treatment (+/-) |
| Addicted friends*6, social support*2,16, supportive relationships* (partner, family, friends)2,6, help seeking*2, being a parent*2 | Informal support (+) |
| Accessibility of (treatment) resources*6, aftercare*5,6, living arrangement*1,5, help seeking*2 | Formal support (+) |
| Having a goal in life* , boredom*, (un)employment* 1,5,6,15,17–19 | Engagement in activities (+) |

** Included in data collection*

*- absence mostly associated with abstinence or presence with relapse*

*+ presence mostly associated with abstinence or absence with relapse*

***Supplementary Table 2. Conditions excluded from QCA analysis***

| Predictor in literature (for either abstinence or relapse) | Reason exclusion |
| --- | --- |
| Biomarkers, family history, genetic factors, hormonal factors, neurocognitive factors, outcome expectancies, physical health, sleeping problems2, time to first remission5 | Outside study scope |
| Co-morbid SUD (poly use)*, drinking goals, negative drinking consequences2 | Nearly all participants are poly substance users |
| Abstinence duration*2, gender*2,5 | Too little variation – nearly all participants male, and abstinence measured at 3 months |
| Number of previous detox admissions*, SUD severity*, treatment history*2 | High SUD severity and multiple previous admissions to inpatient treatment are treatment admission criteria |
| Ethnicity*1, age*1,2,5, religion*2 | Excluded after scoping first 10 cases |
| Coping*2, craving*2, self-efficacy*2,6, substance use in public spaces / availability of substances*6, temptations*6, life events*2, living arrangement*1,5, marital status*1, stigma6,20 | Excluded after scoping first 10 cases, but taken into account in the qualitative analysis for background |
| Motivation*, insight in problems2 | Motivation only measured at baseline, insight in problems difficult to measure through self-reports |
|  | |

***Supplementary Table 3. Definition and calibration of conditions and outcome (1/2)***

| Condition/ outcome | Description | Data source | Values | Calibration |  |
| --- | --- | --- | --- | --- | --- |
| *Abstinence (outcome)* | Non-use of alcohol or drugs 30 days prior to follow-up, excluding tobacco | Follow-up interview | 0 – 30 days of abstinence | Ragin's ‘direct method’, which utilizes the log of the odds to assign set-membership scores21. Upper limit set at 0 (full abstinence), lower limit at 30 (full relapse). The 0.5 threshold set at 3, thereby taking into account the possibility of ‘a slip’, e.g. a minor, temporary setback after which abstinence is resumed, which differs from full relapse22,23 |  |
| *Psychiatric comorbidity* | Psychiatric symptoms above the clinical threshold | Adult Self Report24, moderate to good reliability and internal consistency (>.71)24 and (factorial) validity25.  N.B. ASR DSM subscales (depressive, anxiety, somatic, avoidant personality, attention deficit/hyperactivity and antisocial personality problems) were used for our sample description (Table 1) | T-score for total problems, range 0 – 100, clinical threshold score is 63 | Ragins21 method for direct calibration. Upper limit 100, lower limit 0, .5 limit at 63 | Baseline |
| *MBID* | Mild to borderline intellectual disability (MBID, total IQ 50 – 85) | Screener for Intelligence and Mild Intellectual Disabilities (SCIL)26. Good predictive validity to detect MBID (AUC 0.93) and excellent test-retest reliability 0.9227. | Scores between 0 and 28. The cut-off point for MBID is set at a score of 19,5 (< 19,5 indicates MBID) | Score 1: SCIL < 15  Score 0,67: SCIL 15 – 19,5  Score 0,33: 19,5 – 25  Score ≥ 25 |
| *Social disintegration* | Difficulties performing daily activities and negative social or societal influences | Measurements in the Addictions for Triage and Evaluation (MATE) 2.1. ICN28, modules S 7.2 and S 8.2, with moderate to excellent reliability and moderate to high validity28 | A total score between 0 and 52 for both modules (13 items) combined. Total score is the sum of 13 items with a 5 point scale (0, no problems – 4, complete, severe problems) | Ragins21 method for direct calibration. Upper limit (maximum score) set at 52, lower limit at 0. The 0.5 threshold at 13. |
| *Long treatment* | Treatment length measured in weeks | Participants electronic patient files |  | Score  1: ≥ 20 weeks  Score 0,67: 12 – 20 weeks, excluding completed short treatment  Score  0,33: 4 – 12 weeks, including completed short treatments up to 14 weeks  Score 0: < 4 weeks | Treatment |

***Supplementary Table 3. Definition and calibration of conditions and outcome (2/2)***

| Condition/ outcome | Description | Data source | Values | Calibration |  |
| --- | --- | --- | --- | --- | --- |
| *Informal support* | Support by friends/loved ones | Individual Recovery Outcomes Counter, item 7 (I.ROC)29. The I.ROC validly and reliably measures the patient's recovery process on four domains: (1) home, (2) opportunity, (3) people and (4) empowerment. It has high internal consistency and good convergent validity with two other recovery measures, the RAS and BASIS-3229. | 6-point scale (1= never, 6 = always) | Score 1: always received needed informal support  Score 0,8: almost always received needed informal support  Score 0,6: regularly received needed informal support  Score 0,4: sometimes received needed informal support  Score 0,2: almost never received needed informal support  Score 0: never received needed informal support | Post-treatment |
| *Formal support* | Presence of formal support | Item added to the I.ROC at follow-up for the purpose of this study.  *‘In the past three months, I received the professional support or treatment I needed’* | 6-point scale (1= never, 6 = always) | Score 1: always received needed professional treatment or support  Score 0,8: almost always received needed professional treatment or support  Score 0,6: regularly received needed professional treatment or support  Score 0,4: sometimes received needed professional treatment or support  Score 0,2: almost never received needed professional treatment or support  Score 0: never received needed professional treatment or support |
| *Activities* | Being engaged in daytime activities, such as hobbies or (volunteer) work | Item added to the I.ROC at follow-up for the purpose of this study  *‘In the past three months, I had a job, day care or other daytime activities I participate in’* | 6-point scale (1= never, 6 = always) | Score 1: always had daytime activities  Score 0,8: almost always had daytime activities  Score 0,6: regularly had daytime activities  Score 0,4: sometimes had daytime activities  Score 0,2: never had meaningful daytime activities  Score 0: never had daytime activities |

***Supplementary Table 4. Data matrix (1/2)***

| Client  number | MBID | Psychiatric comorbidity | Social disintegration | Long treatment | Formal support | Informal support | Activities | Abstinence |
| --- | --- | --- | --- | --- | --- | --- | --- | --- |
| 1 | 0.67 | 0.46 | 0.7 | 1 | 0 | 1 | 0 | 0.12 |
| 2 | 0.67 | 0.64 | 0.54 | 1 | 0.2 | 1 | 0.8 | 0.95 |
| 3 | 0.33 | 0.54 | 0.68 | 1 | 1 | 1 | 1 | 0.95 |
| 4 | 0.67 | 0.43 | 0.52 | 1 | 1 | 1 | 1 | 0.95 |
| 5 | 1 | 0.85 | 0.75 | 0.33 | 0.8 | 0.8 | 1 | 0.73 |
| 6 | 0.33 | 0.42 | 0.59 | 1 | 1 | 1 | 1 | 0.5 |
| 7 | 1 | 0.33 | 0.88 | 0.67 | 0.6 | 1 | 1 | 0.95 |
| 8 | 0 | 0.89 | 0.87 | 1 | 1 | 0.6 | 0.8 | 0.47 |
| 9 | 1 | 0.46 | 0.33 | 0.33 | 0.4 | 1 | 1 | 0.95 |
| 10 | 0.67 | 0.5 | 0.54 | 0.33 | 0.2 | 0.8 | 0 | 0.29 |
| 11 | 0.67 | 0.81 | 0.52 | 0.67 | 0.4 | 0.4 | 0.4 | 0.17 |
| 12 | 0.67 | 0.71 | 0.72 | 0.33 | 0.2 | 0.4 | 0.2 | 0.08 |
| 13 | 1 | 0.56 | 0.8 | 0.33 | 0.4 | 0.4 | 1 | 0.95 |
| 14 | 0.67 | 0.6 | 0.65 | 0.67 | 1 | 0.8 | 0.8 | 0.95 |
| 15 | 1 | 0.73 | 0.79 | 0.33 | 1 | 0.4 | 0.6 | 0.95 |
| 16 | 0 | 0.64 | 0.8 | 0.67 | 0 | 0 | 0 | 0.05 |
| 17 | 0.33 | 0.76 | 0.81 | 1 | 0.8 | 1 | 1 | 0.95 |
| 18 | 0.67 | 0.74 | 0.14 | 0.33 | 0.8 | 0.4 | 0.6 | 0.95 |
| 19 | 0.33 | 0.91 | 0.59 | 0.33 | 0.6 | 0.4 | 0.8 | 0.95 |
| 20 | 1 | 0.38 | 0.63 | 0.33 | 0.8 | 0.8 | 1 | 0.95 |
| 21 | 0.33 | 0.54 | 0.33 | 0.33 | 0 | 0.8 | 0.8 | 0.5 |
| 22 | 0.67 | 0.9 | 0.67 | 0.33 | 1 | 0.8 | 1 | 0.95 |
| 23 | 0 | 0.64 | 0.67 | 0.33 | 0.4 | 0.2 | 0 | 0.08 |
| 24 | 0.33 | 0.42 | 0.5 | 0.33 | 0.2 | 1 | 0.8 | 0.44 |
| 25 | 0 | 0.6 | 0.63 | 1 | 1 | 1 | 1 | 0.95 |
| 26 | 0.33 | 0.46 | 0.68 | 0.33 | 0.2 | 1 | 0.6 | 0.95 |
| 27 | 1 | 0.67 | 0.56 | 1 | 1 | 1 | 1 | 0.95 |
| 28 | 0.33 | 0.36 | 0.8 | 0.33 | 1 | 1 | 1 | 0.95 |
| 29 | 1 | 0.44 | 0.59 | 1 | 1 | 1 | 1 | 0.88 |
| 30 | 1 | 0.62 | 0.67 | 0.33 | 1 | 1 | 0.4 | 0.95 |
| 31 | 0.33 | 0.62 | 0.39 | 0.33 | 1 | 1 | 0.6 | 0.95 |
| 32 | 0.33 | 0.58 | 0.28 | 0.33 | 1 | 1 | 1 | 0.05 |
| 33 | 0.67 | 0.42 | 0.68 | 0.33 | 0.6 | 0.4 | 0.8 | 0.88 |
| 34 | 1 | 0.42 | 0.44 | 0.33 | 0 | 0 | 0 | 0.05 |
| 35 | 0.67 | 0.48 | 0.67 | 0.67 | 0.8 | 0.8 | 1 | 0.88 |
| 36 | 0.33 | 0.39 | 0.5 | 0.33 | 1 | 1 | 1 | 0.73 |
| 37 | 1 | 0.89 | 0.77 | 0.33 | 0.6 | 0.6 | 0.4 | 0.47 |
| 38 | 1 | 0.91 | 0.2 | 0.33 | 1 | 1 | 1 | 0.95 |
| 39 | 0.67 | 0.69 | 0.65 | 0.33 | 0.6 | 0.8 | 0.6 | 0.05 |
| 40 | 0.67 | 0.91 | 0.52 | 0.33 | 0 | 0.6 | 1 | 0.42 |
| 41 | 0.67 | 0.52 | 0.33 | 1 | 1 | 0.4 | 0.8 | 0.36 |
| 42 | 0.33 | 0.52 | 0.54 | 0.33 | 0.8 | 1 | 0.6 | 0.95 |

***Supplementary Table 4. Data matrix (2/2)***

| Client  number | MBID | Psychiatric comorbidity | Social disintegration | Long treatment | Formal support | Informal support | Activities | Abstinence |
| --- | --- | --- | --- | --- | --- | --- | --- | --- |
| 43 | 1 | 0.58 | 0.17 | 0.33 | 0.4 | 1 | 1 | 0.05 |
| 45 | 0.33 | 0.91 | 0.28 | 0.33 | 0.4 | 0.4 | 0.2 | 0.05 |
| 46 | 1 | 0.66 | 0.44 | 0.33 | 0 | 0.6 | 0.2 | 0.34 |
| 47 | 1 | 0.12 | 0.8 | 0 | 0.4 | 0.6 | 0.6 | 0.95 |
| 48 | 1 | 0.43 | 0.58 | 0.33 | 0.8 | 1 | 0.6 | 0.73 |
| 49 | 0 | 0.42 | 0.33 | 0.33 | 0.8 | 1 | 1 | 0.95 |
| 50 | 1 | 0.85 | 0.77 | 0.33 | 0.6 | 1 | 0.8 | 0.95 |
| 51 | 1 | 0.82 | 0.2 | 0.33 | 0.4 | 0.2 | 0.6 | 0.05 |
| 52 | 0.33 | 0.48 | 0.09 | 0.33 | 1 | 1 | 0.6 | 0.95 |
| 53 | 0.67 | 0.66 | 0.65 | 0.33 | 0 | 0.4 | 0 | 0.05 |
| 54 | 0.67 | 0.73 | 0.67 | 0.33 | 0 | 0.6 | 0 | 0.05 |
| 55 | 1 | 0.46 | 0.24 | 0.33 | 0.2 | 1 | 1 | 0.95 |
| 56 | 0.33 | 0.79 | 0.61 | 0.33 | 0.8 | 0.8 | 1 | 0.88 |
| 57 | 0 | 0.24 | 0.73 | 0 | 1 | 0.8 | 0.6 | 0.88 |
| 58 | 0.67 | 0.64 | 0.2 | 0 | 0 | 0.6 | 1 | 0.95 |
| 59 | 1 | 0.77 | 0.33 | 0.67 | 0.6 | 0.6 | 0.4 | 0.05 |
|  | | | | | | | | |

***Supplementary Table 5. Truth table abstinence***

| MBID | Psychiatric comorbidity | Social disintegration | Long treatment | Formal support | Informal   support | Activities | n | Abstinence | raw consist. |
| --- | --- | --- | --- | --- | --- | --- | --- | --- | --- |
| 1 | 0 | 1 | 1 | 1 | 1 | 1 | 4 | 1 | 0.902741 |
| 0 | 0 | 1 | 0 | 1 | 1 | 1 | 2 | 1 | 0.888704 |
| 0 | 1 | 1 | 1 | 1 | 1 | 1 | 4 | 1 | 0.884822 |
| 1 | 1 | 1 | 1 | 1 | 1 | 1 | 2 | 1 | 0.881007 |
| 1 | 0 | 1 | 0 | 1 | 1 | 1 | 2 | 1 | 0.878587 |
| 0 | 0 | 0 | 0 | 1 | 1 | 1 | 2 | 1 | 0.868506 |
| 0 | 1 | 1 | 0 | 1 | 1 | 1 | 2 | 1 | 0.856049 |
| 1 | 1 | 1 | 0 | 1 | 1 | 1 | 4 | 1 | 0.84709 |
| 1 | 0 | 0 | 0 | 0 | 1 | 1 | 2 | 1 | 0.836972 |
| 0 | 1 | 0 | 0 | 1 | 1 | 1 | 2 | 0 | 0.829201 |
| 1 | 1 | 0 | 0 | 0 | 1 | 1 | 2 | 0 | 0.789664 |
| 1 | 1 | 1 | 0 | 1 | 1 | 0 | 2 | 0 | 0.769106 |
| 1 | 1 | 1 | 0 | 0 | 0 | 0 | 2 | 0 | 0.45977 |

*N.B. Raw consistency threshold set at 0.8. Rows with < 2 cases removed. Outcome in rows with >25% inconsistencies manually set at 0.*

***Supplementary Table 6. Truth table relapse***

*N.B. Raw consistency threshold set at 0.8. Rows with <1 case removed. Outcome in rows with >25% inconsistencies manually set at 0*

| MBID | Psychiatric comorbidity | Social disintegration | Long treatment | Formal support | Informal  support | Activities | n | Relapse | raw consist. |
| --- | --- | --- | --- | --- | --- | --- | --- | --- | --- |
| 1 | 1 | 1 | 1 | 0 | 0 | 0 | 1 | 1 | 0.92809 |
| 1 | 1 | 1 | 0 | 0 | 0 | 0 | 2 | 1 | 0.925287 |
| 0 | 1 | 1 | 1 | 0 | 0 | 0 | 1 | 1 | 0.913747 |
| 0 | 1 | 1 | 0 | 0 | 0 | 0 | 1 | 1 | 0.912807 |
| 0 | 1 | 0 | 0 | 0 | 0 | 0 | 1 | 1 | 0.894444 |
| 1 | 0 | 0 | 0 | 0 | 0 | 0 | 1 | 1 | 0.891753 |
| 1 | 1 | 1 | 0 | 0 | 1 | 0 | 1 | 1 | 0.845295 |
| 1 | 0 | 1 | 1 | 0 | 1 | 0 | 1 | 1 | 0.825832 |
| 1 | 1 | 0 | 0 | 0 | 1 | 0 | 1 | 1 | 0.823834 |
| 1 | 1 | 0 | 0 | 0 | 0 | 1 | 1 | 0 | 0.712928 |
| 1 | 1 | 1 | 0 | 0 | 0 | 1 | 1 | 0 | 0.675624 |
| 1 | 1 | 0 | 1 | 1 | 0 | 1 | 1 | 0 | 0.668639 |
| 0 | 1 | 0 | 0 | 0 | 1 | 1 | 1 | 0 | 0.629237 |
| 0 | 0 | 1 | 0 | 0 | 1 | 1 | 1 | 0 | 0.622047 |
| 1 | 1 | 1 | 0 | 0 | 1 | 1 | 1 | 0 | 0.618929 |
| 1 | 1 | 0 | 0 | 0 | 1 | 1 | 2 | 0 | 0.615385 |
| 1 | 1 | 0 | 1 | 1 | 1 | 0 | 1 | 0 | 0.609873 |
| 1 | 1 | 1 | 1 | 0 | 1 | 1 | 1 | 0 | 0.590226 |
| 1 | 1 | 1 | 0 | 1 | 1 | 0 | 2 | 0 | 0.586992 |
| 1 | 1 | 0 | 0 | 1 | 0 | 1 | 1 | 0 | 0.585216 |
| 1 | 0 | 0 | 0 | 0 | 1 | 1 | 2 | 0 | 0.580786 |
| 1 | 1 | 1 | 0 | 1 | 0 | 1 | 1 | 0 | 0.556213 |
| 1 | 0 | 1 | 0 | 0 | 1 | 1 | 1 | 0 | 0.55081 |
| 0 | 1 | 1 | 0 | 1 | 0 | 1 | 1 | 0 | 0.538462 |
| 1 | 0 | 1 | 0 | 1 | 0 | 1 | 1 | 0 | 0.510896 |
| 0 | 0 | 1 | 1 | 1 | 1 | 1 | 1 | 0 | 0.485792 |
| 1 | 1 | 0 | 0 | 1 | 1 | 1 | 1 | 0 | 0.469172 |
| 0 | 1 | 1 | 1 | 1 | 1 | 1 | 4 | 0 | 0.452099 |
| 1 | 1 | 1 | 1 | 1 | 1 | 1 | 2 | 0 | 0.437834 |
| 1 | 0 | 1 | 0 | 1 | 1 | 1 | 2 | 0 | 0.437086 |
| 1 | 1 | 1 | 0 | 1 | 1 | 1 | 4 | 0 | 0.437011 |
| 1 | 0 | 1 | 1 | 1 | 1 | 1 | 4 | 0 | 0.436782 |
| 0 | 0 | 0 | 0 | 1 | 1 | 1 | 2 | 0 | 0.431818 |
| 0 | 1 | 1 | 0 | 1 | 1 | 1 | 2 | 0 | 0.427259 |
| 0 | 1 | 0 | 0 | 1 | 1 | 1 | 2 | 0 | 0.42562 |
| 0 | 0 | 1 | 0 | 1 | 1 | 1 | 2 | 0 | 0.418605 |

## Supplementary Table 7. Comparison of in- and excluded respondents

|  | **Included** | **n** | **Excluded** | **n** | **Test-score** | **Sign.** |
| --- | --- | --- | --- | --- | --- | --- |
| **Age (years), mean (SD)** | 43,88 (9,58) | 58 | 38,66 (9,36) | 64 | t= -0,344 | <0,003 |
|  |  |  |  |  |  |  |
| **Gender, % male** | 91,38 | 58 | 80,06 | 64 | Chi2= 0,184 | <0,668 |
|  |  |  |  |  |  |  |
| **MBID (SCIL), mean (SD)** | 17,12 (5,85) | 511 | 17,2 (5,19) | 35 | t=0,067 | <0,947 |
|  |  |  |  |  |  |  |
| **Psychiatric comorbidity (ASR), mean (SD)** | 67,69 (13,15) | 58 | 65,04 (9,99) | 53 | t=-1,188 | <0,237 |
|  |  |  |  |  |  |  |
| **Social disintegration (MATE), mean (SD)** | 18,45 (8,63) | 58 | 15,21 (9,49) | 58 | t=-1,925 | <0,057 |
|  |  |  |  |  |  |  |
| **Treatment completed, % yes** | 51,72 | 58 | 42,18 | 64 | Chi2= 1,112 | <0,292 |
|  |  |  |  |  |  |  |
| **Treatment duration (weeks), mean (SD)** | 14,65 (9,73) | 58 | 12,46 (9,42) | 64 | t=-1,260 | <0,210 |
|  |  |  |  |  |  |  |

For seven patients, SCIL scores were missing, but WAIS-IV scores were available. These cases primarily involved patients with (very) short treatment durations. In order to maintain a diverse sample for the condition ‘long treatment’, we were able to include these cases by using the WAIS-IV score and clinical records to calibrate MBID. This decision was supported by the fact that the WAIS-IV is a more precise measurement tool for assessing intelligence than the SCIL, enabling the reliable determination of the presence or absence of MBID. We assigned an MBID score of 0 or 1 to these cases.

***Supplementary Table 8. Necessary OR-conditions for abstinence and relapse***

| Abstinence | | |
| --- | --- | --- |
| Condition(s) | **Consistency** | **Coverage** |
| Activities+informal support | 0.956 | 0.740 |
| Activities+formal support | 0.944 | 0.783 |
| Informal support+formal support | 0.934 | 0.741 |
| ~ Long treatment+informal support | 0.948 | 0.721 |
| ~Long treatment+activities | 0.924 | 0.726 |
| Relapse | | |
| Condition(s) | **Consistency** | **Coverage** |
| Psychiatric comorbidity+MBID+Social disintegration | 0.902 | 0.410 |
| Psychiatric comorbidity+MBID+~Formal support | 0.944 | 0.417 |
| MBID+Psychiatric comorbidity+~Activities | 0.951 | 0.429 |
| MBID+Psychiatric comorbidity+~Informal support | 0.905 | 0.424 |
| Psychiatric comorbidity+Social disintegration+~Activities | 0.921 | 0.454 |
| Psychiatric comorbidity+Social disintegration+~Formal support | 0.912 | 0.434 |
| MBID+Social disintegration+~Activities | 0.926 | 0.423 |
| MBID+Social disintegration+~formal support | 0.915 | 0.409 |

*N.B. Only necessary (combinations of) conditions are displayed, ~ denotes absence of a condition*

**References**

1. Rollins AL, O’Neill SJ, Davis KE, Devitt TS. Special Section on Relapse Prevention: Substance Abuse Relapse and Factors Associated With Relapse in an Inner-City Sample of Patients With Dual Diagnoses. *Psychiatric Services*. 2005;56(10):1274-1281. doi:10.1176/appi.ps.56.10.1274

2. Sliedrecht W, de Waart R, Witkiewitz K, Roozen HG. Alcohol use disorder relapse factors: A systematic review. *Psychiatry Res*. 2019;278:97-115. doi:10.1016/J.PSYCHRES.2019.05.038

3. Domino KB. Risk Factors for Relapse in Health Care Professionals With Substance Use Disorders. *JAMA*. 2005;293(12):1453. doi:10.1001/jama.293.12.1453

4. Andersson HW, Mosti MP, Nordfjaern T. Inpatients in substance use treatment with co-occurring psychiatric disorders: a prospective cohort study of characteristics and relapse predictors. *BMC Psychiatry*. 2023;23(1):152. doi:10.1186/s12888-023-04632-z

5. Xie H, McHugo GJ, Fox MB, Drake RE. Special Section on Relapse Prevention: Substance Abuse Relapse in a Ten-Year Prospective Follow-up of Clients With Mental and Substance Use Disorders. *Psychiatric Services*. 2005;56(10):1282-1287. doi:10.1176/appi.ps.56.10.1282

6. Barati M, Bashirian S, Mohammadi Y, Moeini B, Mousali A, Afshari M. An ecological approach to exploring factors affecting substance use relapse: a systematic review. *J Public Health* (Bangkok). Published online January 7, 2021. doi:10.1007/s10389-020-01412-x

7. Braatveit KirstenJ, Torsheim T, Hove O. The Prevalence and Characteristics of Intellectual and Borderline Intellectual Disabilities in a Sample of Inpatients with Substance Use Disorders: Preliminary Clinical Results. *J Ment Health Res Intellect Disabil.* 2018;11(3):203-220. doi:10.1080/19315864.2018.1469701

8. van Duijvenbode N, VanDerNagel JEL. A Systematic Review of Substance Use (Disorder) in Individuals with Mild to Borderline Intellectual Disability. *Eur Addict Res.* 2019;25(6):263-282. doi:10.1159/000501679

9. Buchanan J. Missing links? Problem drug use and social exclusion. *Probation Journal.* 2004;51(4):387-397. doi:10.1177/0264550504048246

10. Fleury MJ, Djouini A, Huỳnh C, et al. Remission from substance use disorders: A systematic review and meta-analysis. *Drug Alcohol Depend*. 2016;168:293-306. doi:10.1016/j.drugalcdep.2016.08.625

11. Yang M, Mamy J, Gao P, Xiao S. From Abstinence to Relapse: A Preliminary Qualitative Study of Drug Users in a Compulsory Drug Rehabilitation Center in Changsha, China. *PLoS One*. 2015;10(6):e0130711. doi:10.1371/journal.pone.0130711

12. Brunette MF, Drake RE, Woods M, Hartnett T. A comparison of long-term and short-term residential treatment programs for dual diagnosis patients. *Psychiatric Services.* 2001;52(4):526-528. Accessed July 2, 2020. https://ps.psychiatryonline.org/doi/pdfplus/10.1176/appi.ps.52.4.526

13. Greenfield L, Burgdorf K, Chen X, Porowski A, Roberts T, Herrell J. Effectiveness of Long‐Term Residential Substance Abuse Treatment for Women: Findings from Three National Studies. *Am J Drug Alcohol Abuse*. 2004;30(3):537-550. doi:10.1081/ADA-200032290

14. Hubbard RL, Craddock SG, Flynn PM, Anderson J, Etheridge RM. Overview of 1-Year Follow-Up Outcomes in the Drug Abuse Treatment Outcome Study (DATOS). Vol ll.; 1997.

15. Nordfjærn T. Relapse patterns among patients with substance use disorders. *J Subst Use.* 2011;16(4):313-329. doi:10.3109/14659890903580482

16. Stevens E, Jason LA, Ram D, Light J. Investigating Social Support and Network Relationships in Substance Use Disorder Recovery. *Subst Abus.* 2015;36(4):396-399. doi:10.1080/08897077.2014.965870

17. Magidson JF, Andersen LS, Satinsky EN, et al. “Too much boredom isn’t a good thing”: Adapting behavioral activation for substance use in a resource-limited South African HIV care setting. *Psychotherapy (Chic).* 2020;57(1):107-118. doi:10.1037/pst0000257

18. Wahler EA, Otis MD. Social Stress, Economic Hardship, and Psychological Distress as Predictors of Sustained Abstinence from Substance Use After Treatment. *Subst Use Misuse.* 2014;49(13):1820-1832. doi:10.3109/10826084.2014.935789

19. Nolte-Troha C, Roser P, Henkel D, Scherbaum N, Koller G, Franke AG. Unemployment and Substance Use: An Updated Review of Studies from North America and Europe. *Healthcare*. 2023;11(8):1182. doi:10.3390/healthcare11081182

20. Crapanzano KA, Hammarlund R, Ahmad B, Hunsinger N, Kullar R. The association between perceived stigma and substance use disorder treatment outcomes: a review. *Subst Abuse Rehabil.* 2018;Volume 10:1-12. doi:10.2147/SAR.S183252

21. Ragin CC. *Redesigning Social Inquiry : Fuzzy Sets and Beyond*. University of Chicago Press; 2008.

22. Kadden RM, Litt MD. The role of self-efficacy in the treatment of substance use disorders. *Addictive Behaviors*. 2011;36(12):1120-1126. doi:10.1016/j.addbeh.2011.07.032

23. Moe FD, Moltu C, McKay JR, Nesvåg S, Bjornestad J. Is the relapse concept in studies of substance use disorders a ‘one size fits all’ concept? A systematic review of relapse operationalisations. *Drug Alcohol Rev*. 2022;41(4):743-758. doi:10.1111/dar.13401

24. Achenbach TM, Rescorla LA. *Adult Self-Report Adult Behavior Checklist An Integrated System of Multi-Informant Assessment.*; 2019.

25. Guerrero M, Hoffmann M, Pulkki-Råback L. Psychometric Properties of the Adult Self-Report: Data from over 11,000 American Adults. *Stats (Basel).* 2020;3(4):465-474. doi:10.3390/stats3040029

26. Kaal HL, Nijman HLI, Moonen XMH. *SCIL Handleiding: Screener Voor Intelligentie En Licht Verstandelijke Beperking Voor Volwassenen (SCIL 18+) En Jongeren van 14 Tot En Met 17 Jaar (SCIL 14-17*). Hogrefe; 2015.

27. Nijman H, Kaal H, van Scheppingen L, Moonen X. Development and Testing of a Screener for Intelligence and Learning Disabilities (SCIL). *Journal of Applied Research in Intellectual Disabilities.* 2018;31(1):e59-e67. doi:10.1111/jar.12310

28. Schippers GM, Broekman TG, Buchholz A. *MATE-Nl 2.1 Manual and Protocol.* Bêta Boeken; 2011.

29. Monger B, Hardie SM, Ion R, Cumming J, Henderson N. The Individual Recovery Outcomes Counter: preliminary validation of a personal recovery measure*. Psychiatrist.* 2013;37(7):221-227. doi:10.1192/pb.bp.112.041889
